# Supplementary material
Source: publisher site journal article supplement (https://kjim.org/upload/media/kjim-2024-015-Supplementary-Fig-1.pdf)
Supplement: Supplementary file 1 [file kjim-2024-015-Supplementary-Fig-1.pdf]

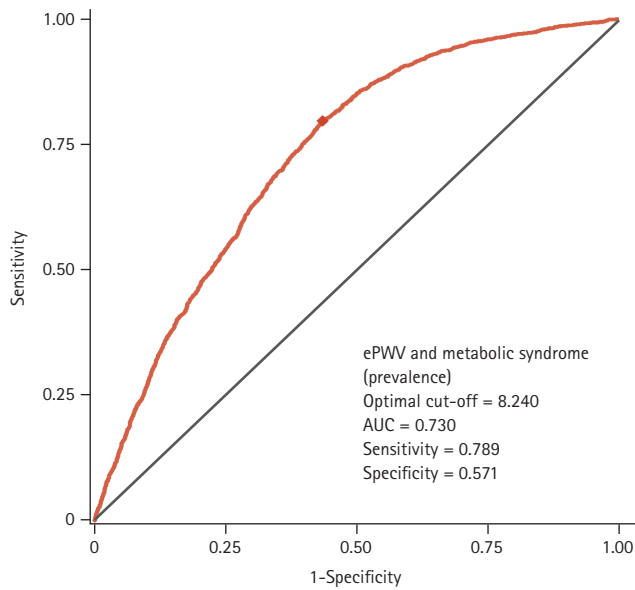

**Supplementary Figure 1.** For the cross-sectional relationship between ePWV and metabolic syndrome, the optimal cut-off value of ePWV for distinguishing participants with metabolic syndrome was 8.240 m/s, as determined by the ROC curve. ePWV, estimated pulse wave velocity; AUC, area under curve; ROC, receiver operating characteristic.
